# Supplementary material for: Photoelectrocatalytic Activity of ZnO-Modified Hematite Films in the Reaction of Alcohol Degradation
Source: MDPI journal article supplement (doi:10.3390/ijms241814046), 2023-09-13
Supplement: s1 [file s1]

# Photoelectrocatalytic Activity of ZnO-Modified Hematite Films in the Reaction of Alcohol Degradation

Vitali A. Grinberg \*, Vitoor V. Emets , Natalia A. Mayorova, Aleksey A. Averin and Andrei A. Shiryayev

Frumkin Institute of Physical Chemistry and Electrochemistry, Russian Academy of Sciences, Leninsky Prospekt 31, Building 4, 119071 Moscow, Russia

\* Correspondence: vgrinberg@phche.ac.ru; vitgreen@mail.ru

## Supplementary materials

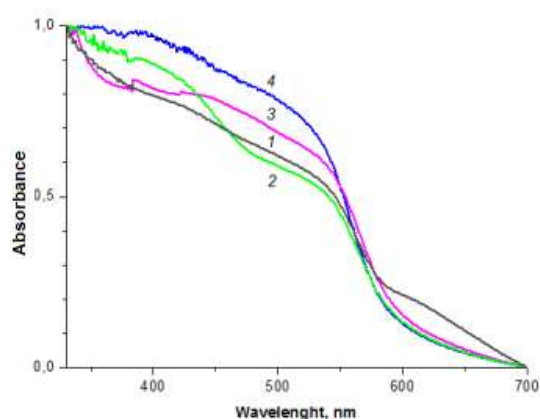

**Figure S1.** Normalized absorption spectra for the film photoanodes: (1)  $\text{Fe}_2\text{O}_3/\text{FTO}$ ; (2)  $\text{ZnO}(0.07)/\text{Fe}_2\text{O}_3/\text{FTO}$ ; (3)  $\text{ZnO}(0.2)/\text{Fe}_2\text{O}_3/\text{FTO}$ ; and (4)  $\text{ZnO}(0.87)/\text{Fe}_2\text{O}_3/\text{FTO}$ .

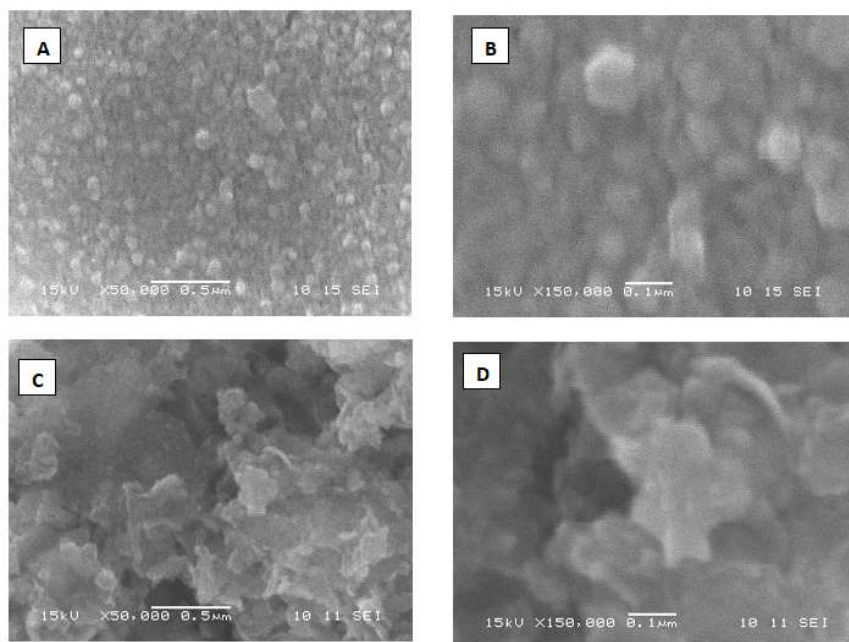

**Figure S2.** SEM images of the hematite films modified with different amounts of electrodeposited ZnO: (A,B)  $\text{ZnO}(0.2)/\text{Fe}_2\text{O}_3/\text{FTO}$ ; and (C,D)  $\text{ZnO}(0.87)/\text{Fe}_2\text{O}_3/\text{FTO}$ . Conditions of the samples preparation are described in section 3.1.

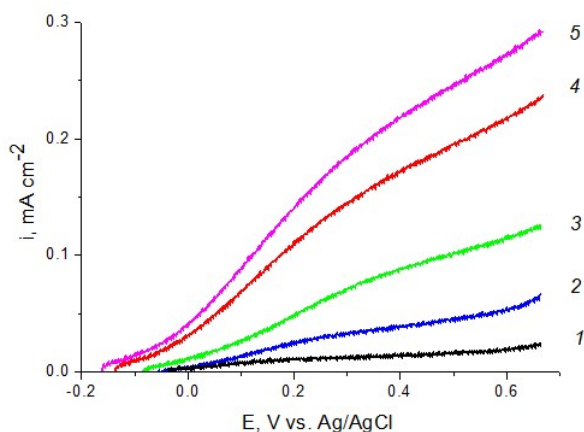

**Figure S3.** Voltammograms of the ZnO(0.07)/Fe<sub>2</sub>O<sub>3</sub>/FTO film photoanode obtained: (1) in "dark" conditions, and (2 - 5) under visible light illumination with a power density of 100 mW cm<sup>-2</sup> in aqueous solutions of (2) 0.1 M KOH; (3) 0.1 M KOH + 20% CH<sub>3</sub>OH; (4) 0.1 M KOH + 20% C<sub>2</sub>H<sub>4</sub>(OH)<sub>2</sub>; and (5) 0.1 M KOH + 20% C<sub>3</sub>H<sub>5</sub>(OH)<sub>3</sub>. The dark curves for all solutions practically coincide. Potential scan rate is 10 mV s<sup>-1</sup>.

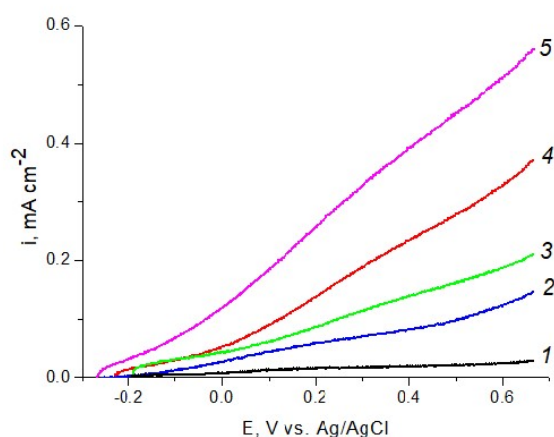

**Figure S4.** Voltammograms of the ZnO(0.87)/Fe<sub>2</sub>O<sub>3</sub>/FTO film photoanode obtained: (1) in "dark" conditions, and (2 - 5) under visible light illumination with a power density of 100 mW cm<sup>-2</sup> in aqueous solutions of (2) 0.1 M KOH; (3) 0.1 M KOH + 20% CH<sub>3</sub>OH; (4) 0.1 M KOH + 20% C<sub>2</sub>H<sub>4</sub>(OH)<sub>2</sub>; and (5) 0.1 M KOH + 20% C<sub>3</sub>H<sub>5</sub>(OH)<sub>3</sub>. The dark curves for all solutions practically coincide. Potential scan rate is 10 mV s<sup>-1</sup>.

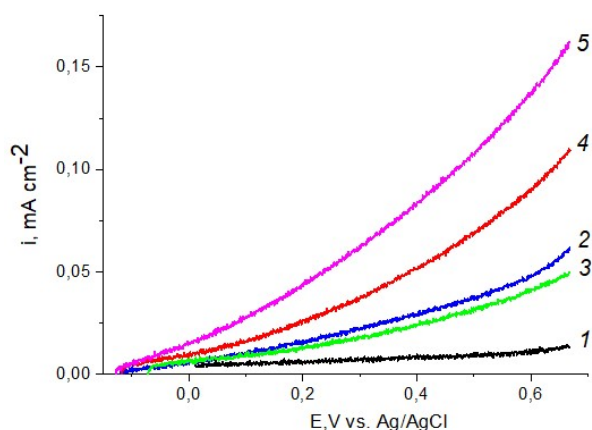

**Figure S5.** Voltammograms of the  $\text{Fe}_2\text{O}_3/\text{FTO}$  film photoanode obtained: (1) in "dark" conditions, and (2 - 5) under visible light illumination with a power density of  $100 \text{ mW cm}^{-2}$  in aqueous solutions of 0.1 M KOH (2); 0.1 M KOH + 20%  $\text{CH}_3\text{OH}$  (3); 0.1 M KOH + 20%  $\text{C}_2\text{H}_4(\text{OH})_2$  (4); and 0.1 M KOH + 20%  $\text{C}_3\text{H}_5(\text{OH})_3$  (5). The dark curves for all solutions practically coincide. Potential scan rate is  $10 \text{ mV s}^{-1}$ .

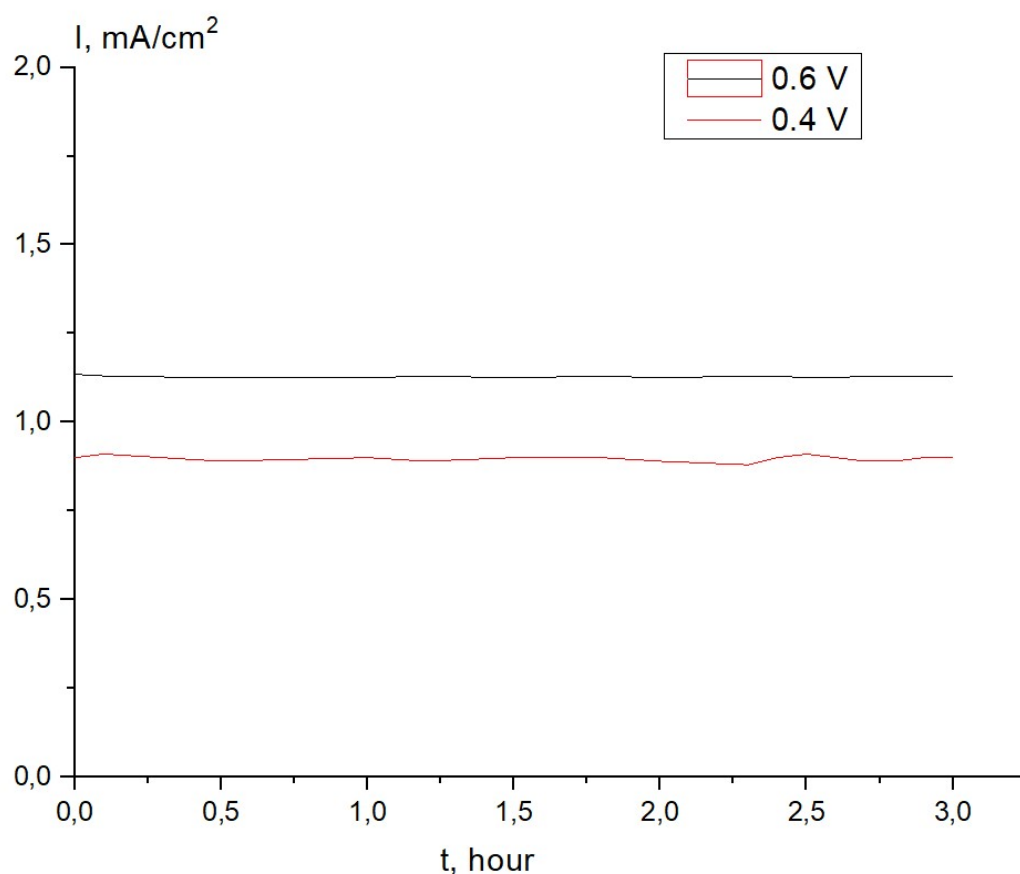

**Figure S6.** Chronoamperograms obtained at the  $\text{ZnO}(0.2)/\text{Fe}_2\text{O}_3/\text{FTO}$  film photoanode at the bias potentials 0.4 V and 0.6 V vs. Ag/AgCl in 0.1 M KOH + 20%  $\text{C}_3\text{H}_5(\text{OH})_3$  aqueous solution under visible light illumination with a power density of  $100 \text{ mW cm}^{-2}$ .

**Table S1.** Calculation of the Zn / Fe weight ratio in hematite samples modified with zinc oxide, where:  $Q_{\text{dep}}$  is the amount of electricity spent on the oxide deposition;  $L$  is an average thickness of the oxide layer;  $d$  is specific gravity of the oxide;  $S$  is the geometric surface area of the photoanode sample;  $P$  is the weight of the metal in the oxide; and  $WR_{\text{Zn:Fe}}$  is the Zn:Fe weight ratio in the sample.

| Sample                                              | $Q_{\text{dep}}, \text{C cm}^{-2}$ | $L, \text{cm}$                      | $d, \text{g cm}^{-3}$ | $S, \text{cm}^{-2}$ | $P, \text{g}$                      | $WR_{\text{Zn:Fe}}$   |
|-----------------------------------------------------|------------------------------------|-------------------------------------|-----------------------|---------------------|------------------------------------|-----------------------|
| $\text{Fe}_2\text{O}_3/\text{FTO}$                  | 3 <sup>*</sup>                     | $7 \times 10^{-5}$ <sup>*</sup>     | 5.1 <sup>*</sup>      | 1                   | $2.5 \times 10^{-4}$ <sup>*</sup>  |                       |
| $\text{ZnO}(0.07)/\text{Fe}_2\text{O}_3/\text{FTO}$ | 0.07 <sup>**</sup>                 | $1.75 \times 10^{-6}$ <sup>**</sup> | 5.6 <sup>**</sup>     | 1                   | $7.8 \times 10^{-6}$ <sup>**</sup> | $3.12 \times 10^{-2}$ |
| $\text{ZnO}(0.2)/\text{Fe}_2\text{O}_3/\text{FTO}$  | 0.2 <sup>**</sup>                  | $5.5 \times 10^{-6}$ <sup>**</sup>  | 5.6 <sup>**</sup>     | 1                   | $2.5 \times 10^{-5}$ <sup>**</sup> | $10^{-1}$             |
| $\text{ZnO}(0.87)/\text{Fe}_2\text{O}_3/\text{FTO}$ | 0.87 <sup>**</sup>                 | $2.24 \times 10^{-5}$ <sup>**</sup> | 5.6 <sup>**</sup>     | 1                   | $10^{-4}$ <sup>**</sup>            | $4 \times 10^{-1}$    |

\* The data refer to the  $\alpha\text{-Fe}_2\text{O}_3$  layer electrodeposited onto FTO glass for all samples;

\*\* The data refer to the ZnO layer electrodeposited onto the  $\alpha\text{-Fe}_2\text{O}_3$  layer.
